# Supplementary material
Source: PubMed Central journal article supplement (PMC9581947)
Supplement: 41541_2022_542_MOESM1_ESM.pdf [file 41541_2022_542_MOESM1_ESM.pdf]

1 **Heat inactivated modified vaccinia virus Ankara boosts Th1 cellular and humoral**  
2 **immunity as vaccine adjuvant**

3

4 Ning Yang<sup>1</sup>, Aitor Garcia<sup>2</sup>, Cindy Meyer<sup>2</sup>, Thomas Tuschl<sup>2</sup>, Taha Merghoub<sup>3,4,5</sup>, Jedd D.

5 Wolchok<sup>3,4,5</sup>, and Liang Deng<sup>1,3,4,5\*</sup>

6

7 <sup>1</sup>Dermatology Service, Department of Medicine, Memorial Sloan Kettering Cancer Center, New  
8 York, NY, 10065, USA

9 <sup>2</sup>Laboratory of RNA Molecular Biology, The Rockefeller University, New York, NY, 10065, USA

10 <sup>3</sup>Immuno-oncology service, Human Oncology and Pathogenesis Program; Memorial Sloan  
11 Kettering Cancer Center, New York, NY 10065, USA

12 <sup>4</sup>Parker Institute for Cancer Immunotherapy, Memorial Sloan Kettering Cancer Center, New  
13 York, NY, USA

14 <sup>5</sup>Weill Cornell Medical College, New York, NY, USA

15 \*corresponding authors. Mailing address for Liang Deng: Dermatology Service, Department of  
16 Medicine, Memorial Sloan Kettering Cancer Center, 1275 York Ave., New York, NY 10065.

17 Email: [dengl@mskcc.org](mailto:dengl@mskcc.org).

18

19 Short title: heat-inactivated MVA as a vaccine adjuvant

20 This file contains:

- 21 - Supplementary Figure 1
- 22 - Supplementary Figure 2
- 23 - Supplementary Figure 3

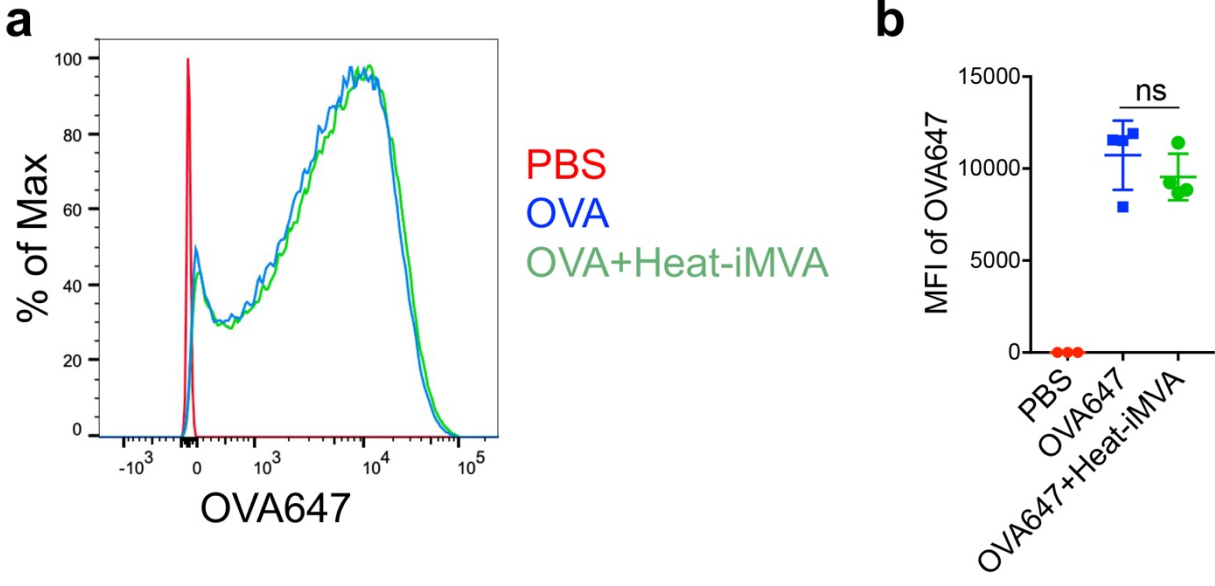

24 **Supplementary Figure 1. Heat-iMVA infection of BMDCs does not enhance antigen uptake**  
25 **in vitro.** (a-b) BMDC were infected with Heat-iMVA (MOI of 1) for 1 h and then incubated  
26 with OVA-647 (0.5 mg/ml) for 1 h. The fluorescence intensities of phagocytosed OVA-647 in  
27 BMDC were measured by flow cytometry.



28 **Supplementary Figure 2. Time-resolved transcriptome profiling of WT or STING<sup>Gt/Gt</sup>**  
29 **BMDCs infected with either live MVA or heat-iMVA. (a)** A heat map of a one-way  
30 hierarchical clustering analysis of the top 200 genes ranked by Z-score of log<sub>2</sub>RPKM, indicating  
31 genes that exhibited the most statistically significant changes in gene expression over the course  
32 of the experiment. Several clusters of genes with similar gene expression changes were observed  
33 (indicated as a1-2, b1-3, and c). **(b)** A heat map of a subset of genes from panel A, showing IFN-  
34 regulated genes and genes involved in inflammation. **(c)** A heat map of a one-way hierarchical  
35 cluster analysis of MVA and Heat-iMVA transcriptome, using log<sub>2</sub> RPKM, illustrating the  
36 temporal pattern of viral gene expression changes. Light gray: 2 h. Medium gray: 4 h. Black: 6 h.

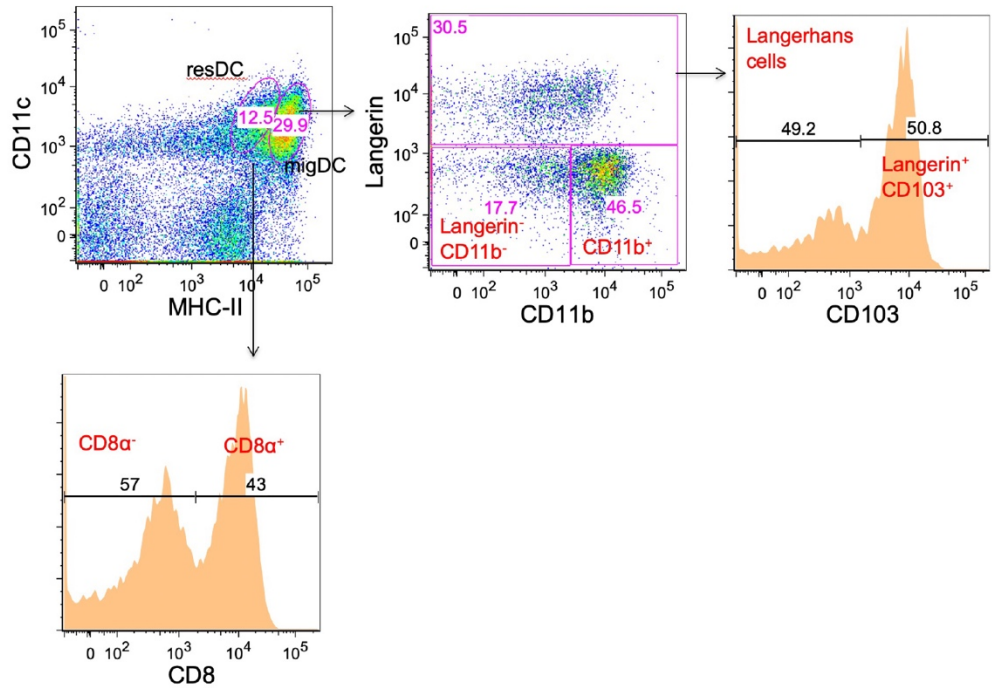

37 **Supplementary Figure 3. Gating strategy of dendritic cell populations in skin LN.** Skin LN  
 38 were harvested and digested into single cell suspension. Cells were stained with a cocktail of  
 39 antibodies to distinguish DC subsets. Within single cells, dead cells, CD119<sup>+</sup>, DX5<sup>+</sup>, TER119<sup>+</sup>  
 40 and CD3ε<sup>+</sup> cells were excluded for analysis. The CD11c<sup>hi</sup> MHC II<sup>int</sup> population represents  
 41 lymphoid resident DCs, and can be further divided into CD8<sup>+</sup> and CD8<sup>-</sup> DCs. CD11c<sup>int/hi</sup> MHC  
 42 II<sup>hi</sup> cells were further analyzed for the expression of Langerin and CD11b to define skin  
 43 migratory DC subsets. Langerin<sup>-</sup> cells were divided into CD11b<sup>+</sup> DCs and CD11b<sup>-</sup> DCs.  
 44 Langerin<sup>+</sup> cells were further analyzed for the expression of CD103 and divided into two groups:  
 45 CD103<sup>+</sup> DCs and langerhans cells.
